# Supplementary material for: Cyclosporine A and Tacrolimus Induce Functional Impairment and Inflammatory Reactions in Endothelial Progenitor Cells
Source: MDPI journal article supplement (doi:10.3390/ijms22189696), 2021-09-08
Supplement: s1 [file s1]

Supplemental Figures

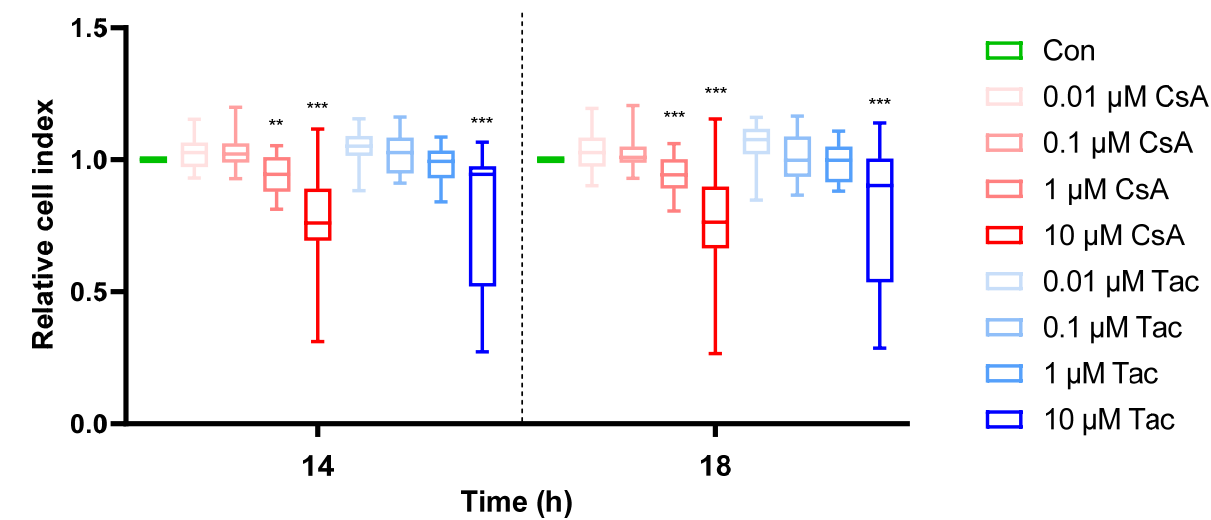

**Supplemental Figure S1.** High dose cyclosporine A (CsA) and tacrolimus (Tac) impaired ECFC proliferation. ECFC proliferation was significantly decreased after treatment with 1  $\mu$ M or 10  $\mu$ M CsA or 10  $\mu$ M Tac after 14 h and 18 h. n = 13 – 27; control group set as 1. Con, control; CsA, cyclosporine A; Tac, tacrolimus. \*\* P < 0.01, \*\*\* P < 0.001.

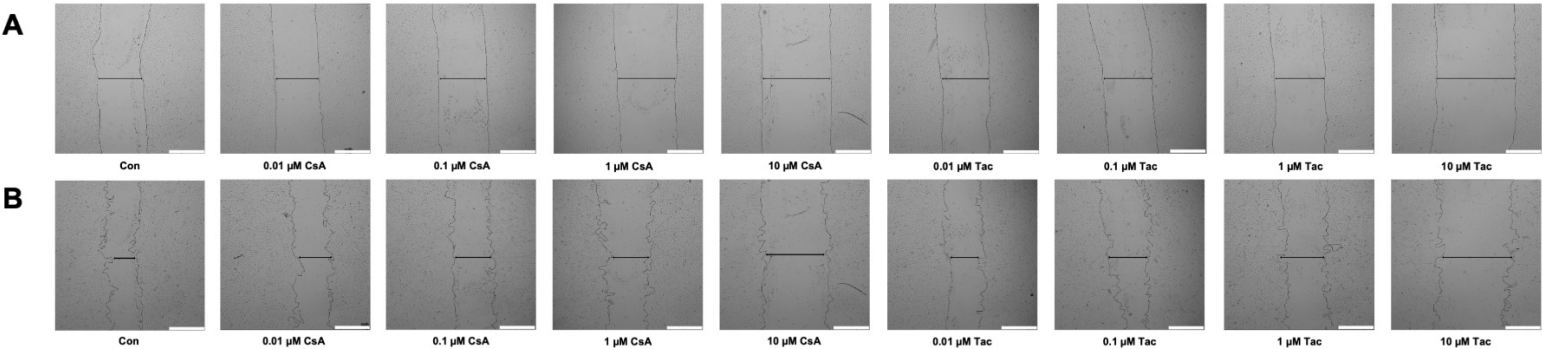

**Supplemental Figure S2.** Representative images of monolayers with scratch wounds at 0 h (A) and 18 h (B) of incubation with vehicle control only, 0.01  $\mu$ M CsA, 0.1  $\mu$ M CsA, 1  $\mu$ M CsA, 10  $\mu$ M CsA, 0.01  $\mu$ M Tac, 0.1  $\mu$ M Tac, 1  $\mu$ M Tac, 10  $\mu$ M Tac, scale bar 1000  $\mu$ m. Cell-free area after 18 h was subtracted from cell-free area at start to calculate remigrated area.
