# Supplementary material for: Cyclosporine A and Tacrolimus Induce Functional Impairment and Inflammatory Reactions in Endothelial Progenitor Cells
Source: MDPI journal article supplement (doi:10.3390/ijms22189696), 2021-09-08
Supplement: s1 [file s1]

**Supplemental Table S1.** Statistical analysis of the cell index (24 h).

| Treatment        | Median | IQR       | p      | n  |
|------------------|--------|-----------|--------|----|
| 0.01 $\mu$ M CsA | 0.99   | 0.95-1.05 | 0.84   | 13 |
| 0.1 $\mu$ M CsA  | 0.99   | 0.97-1.04 | 0.98   | 15 |
| 1 $\mu$ M CsA    | 0.94   | 0.85-0.98 | <0.001 | 26 |
| 10 $\mu$ M CsA   | 0.75   | 0.56-0.89 | <0.001 | 26 |
| 0.01 $\mu$ M Tac | 1.09   | 1.00-1.12 | 0.14   | 16 |
| 0.1 $\mu$ M Tac  | 1.05   | 0.93-1.13 | 0.68   | 15 |
| 1 $\mu$ M Tac    | 0.99   | 0.89-1.05 | 0.31   | 22 |
| 10 $\mu$ M Tac   | 0.88   | 0.52-1.00 | <0.001 | 27 |

**Supplemental Table S2.** Statistical analysis of the cell index (48 h).

| Treatment        | Median | IQR       | p      | n  |
|------------------|--------|-----------|--------|----|
| 0.01 $\mu$ M CsA | 1.00   | 0.96-1.04 | >0.99  | 13 |
| 0.1 $\mu$ M CsA  | 1.04   | 0.98-1.08 | 0.12   | 15 |
| 1 $\mu$ M CsA    | 0.93   | 0.88-0.98 | <0.001 | 26 |
| 10 $\mu$ M CsA   | 0.73   | 0.47-0.88 | <0.001 | 26 |
| 0.01 $\mu$ M Tac | 1.04   | 0.97-1.14 | 0.19   | 16 |
| 0.1 $\mu$ M Tac  | 1.03   | 0.90-1.13 | 0.80   | 15 |
| 1 $\mu$ M Tac    | 0.95   | 0.89-0.97 | 0.004  | 22 |
| 10 $\mu$ M Tac   | 0.84   | 0.60-0.94 | <0.001 | 27 |

**Supplemental Table S3.** Statistical analysis of the cell index (72 h).

| Treatment        | Median | IQR       | p      | n  |
|------------------|--------|-----------|--------|----|
| 0.01 $\mu$ M CsA | 1.04   | 0.97-1.09 | 0.20   | 13 |
| 0.1 $\mu$ M CsA  | 1.06   | 0.96-1.10 | 0.14   | 15 |
| 1 $\mu$ M CsA    | 0.92   | 0.87-0.99 | 0.004  | 26 |
| 10 $\mu$ M CsA   | 0.74   | 0.50-0.87 | <0.001 | 26 |
| 0.01 $\mu$ M Tac | 1.08   | 0.93-1.17 | 0.18   | 16 |
| 0.1 $\mu$ M Tac  | 1.03   | 0.80-1.13 | 0.98   | 15 |
| 1 $\mu$ M Tac    | 0.90   | 0.88-0.93 | <0.001 | 22 |
| 10 $\mu$ M Tac   | 0.84   | 0.68-0.97 | <0.001 | 27 |

**Supplemental Table S4.** Statistical analysis of the cell index (14 h).

| Treatment        | Median | IQR       | p      | n  |
|------------------|--------|-----------|--------|----|
| 0.01 $\mu$ M CsA | 1.03   | 0.97-1.07 | 0.19   | 13 |
| 0.1 $\mu$ M CsA  | 1.02   | 0.99-1.06 | 0.11   | 15 |
| 1 $\mu$ M CsA    | 0.95   | 0.88-1.01 | 0.002  | 26 |
| 10 $\mu$ M CsA   | 0.76   | 0.69-0.89 | <0.001 | 26 |
| 0.01 $\mu$ M Tac | 1.05   | 1.02-1.09 | 0.06   | 16 |
| 0.1 $\mu$ M Tac  | 1.03   | 0.95-1.08 | 0.39   | 15 |
| 1 $\mu$ M Tac    | 0.99   | 0.93-1.04 | 0.43   | 22 |
| 10 $\mu$ M Tac   | 0.95   | 0.52-0.98 | <0.001 | 27 |



**Supplemental Table S5.** Statistical analysis of the cell index (18 h).

| Treatment        | Median | IQR       | p      | n  |
|------------------|--------|-----------|--------|----|
| 0.01 $\mu$ M CsA | 1.03   | 0.98-1.08 | 0.34   | 13 |
| 0.1 $\mu$ M CsA  | 1.01   | 0.99-1.05 | 0.21   | 15 |
| 1 $\mu$ M CsA    | 0.94   | 0.89-1.00 | <0.001 | 26 |
| 10 $\mu$ M CsA   | 0.76   | 0.66-0.90 | <0.001 | 26 |
| 0.01 $\mu$ M Tac | 1.08   | 1.02-1.12 | 0.06   | 16 |
| 0.1 $\mu$ M Tac  | 1.00   | 0.94-1.09 | 0.60   | 15 |
| 1 $\mu$ M Tac    | 1.00   | 0.92-1.05 | 0.46   | 22 |
| 10 $\mu$ M Tac   | 0.90   | 0.54-1.00 | <0.001 | 27 |

**Supplemental Table S6.** Statistical analysis of apoptosis and necrosis – early apoptotic cells (%).

| Treatment        | Median | IQR          | p     | n |
|------------------|--------|--------------|-------|---|
| Con              | 1.57%  | 1.51%-1.97%  | -/-   | 5 |
| 0.01 $\mu$ M CsA | 2.01%  | 0.73%-3.21%  | >0.99 | 5 |
| 0.1 $\mu$ M CsA  | 0.84%  | 0.64%-2.78%  | >0.99 | 5 |
| 1 $\mu$ M CsA    | 2.16%  | 1.28%-4.01%  | 0.80  | 5 |
| 10 $\mu$ M CsA   | 3.40%  | 2.62%-12.12% | 0.57  | 5 |
| 0.01 $\mu$ M Tac | 1.55%  | 0.81%-18.73% | 0.87  | 5 |
| 0.1 $\mu$ M Tac  | 1.53%  | 0.78%-14.18% | 0.90  | 5 |
| 1 $\mu$ M Tac    | 1.40%  | 1.05%-14.32% | 0.88  | 5 |
| 10 $\mu$ M Tac   | 2.60%  | 1.41%-17.63% | 0.83  | 5 |

**Supplemental Table S7.** Statistical analysis of apoptosis and necrosis – late apoptotic cells (%).

| Treatment        | Median | IQR          | p     | n |
|------------------|--------|--------------|-------|---|
| Con              | 3.26%  | 2.07%-4.33%  | -/-   | 5 |
| 0.01 $\mu$ M CsA | 2.34%  | 1.84%-4.09%  | >0.99 | 5 |
| 0.1 $\mu$ M CsA  | 2.10%  | 1.10%-4.15%  | 0.98  | 5 |
| 1 $\mu$ M CsA    | 3.13%  | 2.34%-5.14%  | >0.99 | 5 |
| 10 $\mu$ M CsA   | 5.74%  | 4.55%-14.67% | 0.52  | 5 |
| 0.01 $\mu$ M Tac | 2.68%  | 1.79%-13.18% | 0.96  | 5 |
| 0.1 $\mu$ M Tac  | 2.66%  | 1.40%-9.31%  | >0.99 | 5 |
| 1 $\mu$ M Tac    | 2.65%  | 2.38%-10.26% | 0.96  | 5 |
| 10 $\mu$ M Tac   | 3.94%  | 2.62%-12.86% | 0.87  | 5 |

**Supplemental Table S8.** Statistical analysis of apoptosis and necrosis – necrotic cells (%).

| Treatment        | Median | IQR          | p     | n |
|------------------|--------|--------------|-------|---|
| Con              | 3.98%  | 1.98%-4.81   | -/-   | 5 |
| 0.01 $\mu$ M CsA | 3.73%  | 3.09%-5.15%  | 0.87  | 5 |
| 0.1 $\mu$ M CsA  | 4.25%  | 3.81%-6.11%  | 0.61  | 5 |
| 1 $\mu$ M CsA    | 3.81%  | 3.04%-5.24%  | 0.90  | 5 |
| 10 $\mu$ M CsA   | 8.50%  | 5.04%-16.02% | 0.31  | 5 |
| 0.01 $\mu$ M Tac | 3.46%  | 1.71%-4.29%  | 0.90  | 5 |
| 0.1 $\mu$ M Tac  | 3.38%  | 2.96%-4.69%  | >0.99 | 5 |
| 1 $\mu$ M Tac    | 3.88%  | 3.76%-5.66%  | 0.30  | 5 |
| 10 $\mu$ M Tac   | 6.02%  | 2.51%-6.81%  | 0.18  | 5 |



**Supplemental Table S9.** Statistical analysis of chemotaxis ability.

| Treatment        | Median | IQR       | p      | n  |
|------------------|--------|-----------|--------|----|
| 0.01 $\mu$ M CsA | 0.83   | 0.73-1.01 | 0.02   | 20 |
| 0.1 $\mu$ M CsA  | 0.80   | 0.59-0.94 | <0.001 | 20 |
| 1 $\mu$ M CsA    | 0.74   | 0.69-0.81 | <0.001 | 20 |
| 10 $\mu$ M CsA   | 0.72   | 0.57-0.83 | <0.001 | 20 |
| 0.01 $\mu$ M Tac | 0.77   | 0.65-0.99 | 0.02   | 20 |
| 0.1 $\mu$ M Tac  | 0.80   | 0.62-0.88 | <0.001 | 20 |
| 1 $\mu$ M Tac    | 0.76   | 0.65-0.88 | <0.001 | 20 |
| 10 $\mu$ M Tac   | 0.82   | 0.67-0.97 | <0.001 | 20 |

**Supplemental Table S10.** Statistical analysis of migration ability.

| Treatment        | Median | IQR       | p      | n  |
|------------------|--------|-----------|--------|----|
| 0.01 $\mu$ M CsA | 0.76   | 0.64-0.86 | <0.001 | 15 |
| 0.1 $\mu$ M CsA  | 0.75   | 0.70-0.86 | <0.001 | 15 |
| 1 $\mu$ M CsA    | 0.71   | 0.65-0.95 | <0.001 | 16 |
| 10 $\mu$ M CsA   | 0.40   | 0.33-0.68 | <0.001 | 15 |
| 0.01 $\mu$ M Tac | 0.81   | 0.73-0.93 | 0.003  | 16 |
| 0.1 $\mu$ M Tac  | 0.80   | 0.71-0.95 | 0.002  | 15 |
| 1 $\mu$ M Tac    | 0.77   | 0.72-0.86 | 0.002  | 16 |
| 10 $\mu$ M Tac   | 0.78   | 0.65-0.92 | <0.001 | 15 |

**Supplemental Table S11.** Statistical analysis of cytotoxicity determined by LDH release (% of positive control).

| Treatment      | Median | IQR           | p    | n |
|----------------|--------|---------------|------|---|
| Con            | 25.78% | 20.71%-39.46% | -/-  | 9 |
| 1 $\mu$ M CsA  | 27.96% | 18.20%-33.58% | 0.73 | 9 |
| 10 $\mu$ M CsA | 38.43% | 18.74%-66.15% | 0.61 | 9 |
| 1 $\mu$ M Tac  | 28.94% | 19.69%-42.73% | 0.73 | 9 |
| 10 $\mu$ M Tac | 31.22% | 29.20%-41.96% | 0.08 | 9 |

**Supplemental Table S12.** Statistical analysis of tube length determined in an *in vitro* angiogenesis assay.

| Treatment        | Median | IQR       | p      | n  |
|------------------|--------|-----------|--------|----|
| 0.01 $\mu$ M CsA | 0.77   | 0.66-0.96 | 0.005  | 12 |
| 0.1 $\mu$ M CsA  | 0.67   | 0.56-0.80 | <0.001 | 12 |
| 1 $\mu$ M CsA    | 0.57   | 0.52-0.74 | <0.001 | 12 |
| 10 $\mu$ M CsA   | 0.47   | 0.31-0.61 | <0.001 | 12 |
| 0.01 $\mu$ M Tac | 0.79   | 0.72-0.83 | 0.02   | 12 |
| 0.1 $\mu$ M Tac  | 0.72   | 0.58-0.77 | <0.001 | 12 |
| 1 $\mu$ M Tac    | 0.68   | 0.48-0.74 | <0.001 | 12 |
| 10 $\mu$ M Tac   | 0.47   | 0.16-0.67 | <0.001 | 12 |



**Supplemental Table S13.** Statistical analysis of AKT phosphorylation determined by immunoblot.

| Treatment      | Median | IQR       | p    | n |
|----------------|--------|-----------|------|---|
| 1 $\mu$ M CsA  | 0.76   | 0.71-0.92 | 0.04 | 4 |
| 10 $\mu$ M CsA | 0.95   | 0.77-1.01 | 0.27 | 4 |
| 1 $\mu$ M Tac  | 0.70   | 0.56-0.84 | 0.03 | 4 |
| 10 $\mu$ M Tac | 0.78   | 0.69-0.85 | 0.01 | 4 |

**Supplemental Table S14.** Statistical analysis of TNF- $\alpha$  mRNA expression determined by qRT-PCR.

| Treatment           | Median | IQR       | p    | n |
|---------------------|--------|-----------|------|---|
| 1 $\mu$ M CsA       | 1.63   | 1.25-2.11 | 0.03 | 5 |
| 10 $\mu$ M CsA      | 2.94   | 2.11-4.12 | 0.01 | 6 |
| 1 $\mu$ M Tac       | 1.85   | 1.25-2.39 | 0.03 | 6 |
| 10 $\mu$ M Tac      | 2.00   | 1.83-5.54 | 0.03 | 6 |
| 1 $\mu$ M CsA + Pa  | 0.77   | 0.36-2.35 | 0.80 | 4 |
| 10 $\mu$ M CsA + Pa | 1.60   | 0.85-4.88 | 0.30 | 4 |
| 1 $\mu$ M Tac + Pa  | 0.71   | 0.47-2.24 | 0.81 | 4 |
| 10 $\mu$ M Tac + Pa | 0.99   | 0.31-4.44 | 0.50 | 4 |

**Supplemental Table S15.** Statistical analysis of IL-6 mRNA expression determined by qRT-PCR.

| Treatment           | Median | IQR       | p    | n |
|---------------------|--------|-----------|------|---|
| 1 $\mu$ M CsA       | 1.67   | 1.31-3.36 | 0.03 | 6 |
| 10 $\mu$ M CsA      | 1.56   | 1.20-2.04 | 0.02 | 6 |
| 1 $\mu$ M Tac       | 2.37   | 1.79-4.64 | 0.03 | 6 |
| 10 $\mu$ M Tac      | 1.65   | 1.47-2.73 | 0.03 | 6 |
| 1 $\mu$ M CsA + Pa  | 1.01   | 0.84-1.47 | 0.58 | 4 |
| 10 $\mu$ M CsA + Pa | 0.87   | 0.80-4.10 | 0.46 | 4 |
| 1 $\mu$ M Tac + Pa  | 1.63   | 0.88-2.14 | 0.21 | 4 |
| 10 $\mu$ M Tac + Pa | 1.02   | 0.87-1.42 | 0.56 | 4 |

**Supplemental Table S16.** Statistical analysis of VCAM mRNA expression determined by qRT-PCR.

| Treatment           | Median | IQR       | p    | n |
|---------------------|--------|-----------|------|---|
| 1 $\mu$ M CsA       | 2.13   | 1.60-3.17 | 0.02 | 6 |
| 10 $\mu$ M CsA      | 2.09   | 1.83-2.60 | 0.01 | 5 |
| 1 $\mu$ M Tac       | 2.39   | 1.80-3.57 | 0.03 | 6 |
| 10 $\mu$ M Tac      | 2.11   | 1.66-3.66 | 0.04 | 5 |
| 1 $\mu$ M CsA + Pa  | 1.11   | 0.91-1.22 | 0.40 | 4 |
| 10 $\mu$ M CsA + Pa | 1.05   | 0.71-1.20 | 0.93 | 4 |
| 1 $\mu$ M Tac + Pa  | 1.16   | 0.76-1.65 | 0.47 | 4 |
| 10 $\mu$ M Tac + Pa | 0.91   | 0.60-1.09 | 0.40 | 4 |



**Supplemental Table S17.** Statistical analysis of ICAM mRNA expression determined by qRT-PCR.

| Treatment           | Median | IQR       | p    | n |
|---------------------|--------|-----------|------|---|
| 1 $\mu$ M CsA       | 1.44   | 1.25-1.65 | 0.02 | 6 |
| 10 $\mu$ M CsA      | 2.60   | 1.61-4.03 | 0.02 | 6 |
| 1 $\mu$ M Tac       | 1.90   | 1.31-2.58 | 0.01 | 6 |
| 10 $\mu$ M Tac      | 2.14   | 1.69-3.54 | 0.03 | 6 |
| 1 $\mu$ M CsA + Pa  | 1.05   | 0.83-1.23 | 0.77 | 4 |
| 10 $\mu$ M CsA + Pa | 1.01   | 0.79-1.22 | 0.97 | 4 |
| 1 $\mu$ M Tac + Pa  | 1.20   | 1.02-1.32 | 0.12 | 4 |
| 10 $\mu$ M Tac + Pa | 0.92   | 0.79-1.09 | 0.45 | 4 |

**Supplemental Table S18.** Statistical analysis of PECAM surface expression determined by flow cytometry (subset) (%).

| Treatment          | Median | IQR           | p    | n |
|--------------------|--------|---------------|------|---|
| Con                | 99.65% | 99.00%-99.73% | -/-  | 6 |
| 1 $\mu$ M CsA      | 99.80% | 99.68%-99.93% | 0.04 | 6 |
| 1 $\mu$ M Tac      | 99.85% | 99.48%-99.93% | 0.12 | 6 |
| Pa                 | 97.80% | 94.50%-99.80% | 0.30 | 3 |
| 1 $\mu$ M CsA + Pa | 98.00% | 97.30%-99.60% | 0.30 | 3 |
| 1 $\mu$ M Tac + Pa | 97.20% | 96.90%-99.80% | 0.27 | 3 |

**Supplemental Table S19.** Statistical analysis of PECAM surface expression determined by flow cytometry (subset shift) (%).

| Treatment          | Median | IQR           | p     | n |
|--------------------|--------|---------------|-------|---|
| Con                | 49.75% | 41.98%-53.15% | -/-   | 6 |
| 1 $\mu$ M CsA      | 67.20% | 48.55%-92.43% | 0.047 | 6 |
| 1 $\mu$ M Tac      | 68.65% | 47.43%-90.95% | 0.10  | 6 |
| Pa                 | 48.60% | 22.00%-61.80% | 0.69  | 3 |
| 1 $\mu$ M CsA + Pa | 42.50% | 24.00%-52.20% | 0.33  | 3 |
| 1 $\mu$ M Tac + Pa | 30.60% | 22.90%-63.20% | 0.46  | 3 |

**Supplemental Table S20.** Statistical analysis of VCAM surface expression determined by flow cytometry (subset) (%).

| Treatment          | Median | IQR           | p    | n |
|--------------------|--------|---------------|------|---|
| Con                | 70.20% | 39.00%-90.75% | -/-  | 6 |
| 1 $\mu$ M CsA      | 87.60% | 58.65%-95.28% | 0.48 | 6 |
| 1 $\mu$ M Tac      | 80.10% | 46.85%-95.50% | 0.75 | 6 |
| Pa                 | 61.50% | 19.70%-83.00% | 0.87 | 3 |
| 1 $\mu$ M CsA + Pa | 37.50% | 17.50%-73.30% | 0.79 | 3 |
| 1 $\mu$ M Tac + Pa | 55.60% | 24.70%-83.30% | 0.87 | 3 |



**Supplemental Table S21.** Statistical analysis of VCAM surface expression determined by flow cytometry (subset shift) (%).

| Treatment          | Median | IQR           | p      | n |
|--------------------|--------|---------------|--------|---|
| Con                | 45.35% | 41.55%-47.40% | -/-    | 6 |
| 1 $\mu$ M CsA      | 69.30% | 59.63%-80.95% | <0.001 | 6 |
| 1 $\mu$ M Tac      | 48.65% | 40.45%-65.78% | 0.25   | 6 |
| Pa                 | 50.60% | 44.00%-61.00% | 0.34   | 3 |
| 1 $\mu$ M CsA + Pa | 36.90% | 27.60%-38.80% | 0.06   | 3 |
| 1 $\mu$ M Tac + Pa | 55.00% | 39.20%-57.80% | 0.49   | 3 |

**Supplemental Table S22.** Statistical analysis of NF- $\kappa$ B p65 phosphorylation determined by immunoblot.

| Treatment      | Median | IQR       | p    | n |
|----------------|--------|-----------|------|---|
| 1 $\mu$ M CsA  | 1.55   | 1.17-1.82 | 0.03 | 6 |
| 10 $\mu$ M CsA | 1.17   | 1.09-1.37 | 0.03 | 6 |
| 1 $\mu$ M Tac  | 1.39   | 1.30-2.26 | 0.03 | 6 |
| 10 $\mu$ M Tac | 1.28   | 1.16-1.59 | 0.03 | 6 |
| TNF- $\alpha$  | 1.63   | 1.39-3.04 | 0.03 | 6 |

**Supplemental Table S23.** Statistical analysis of NF- $\kappa$ B p65 nuclear translocation (%) determined by immunofluorescence.

| Treatment     | Median | IQR           | p     | n |
|---------------|--------|---------------|-------|---|
| Con           | 3.13%  | 0.00%-17.50%  | -/-   | 6 |
| 1 $\mu$ M CsA | 88.10% | 80.93%-96.59% | 0.002 | 6 |
| 1 $\mu$ M Tac | 89.44% | 85.61%-92.86% | 0.002 | 6 |
